# Supplementary material
Source: ML conference proceedings conference paper supplement (https://openreview.net/forum?id=m3VzVmgjGC)

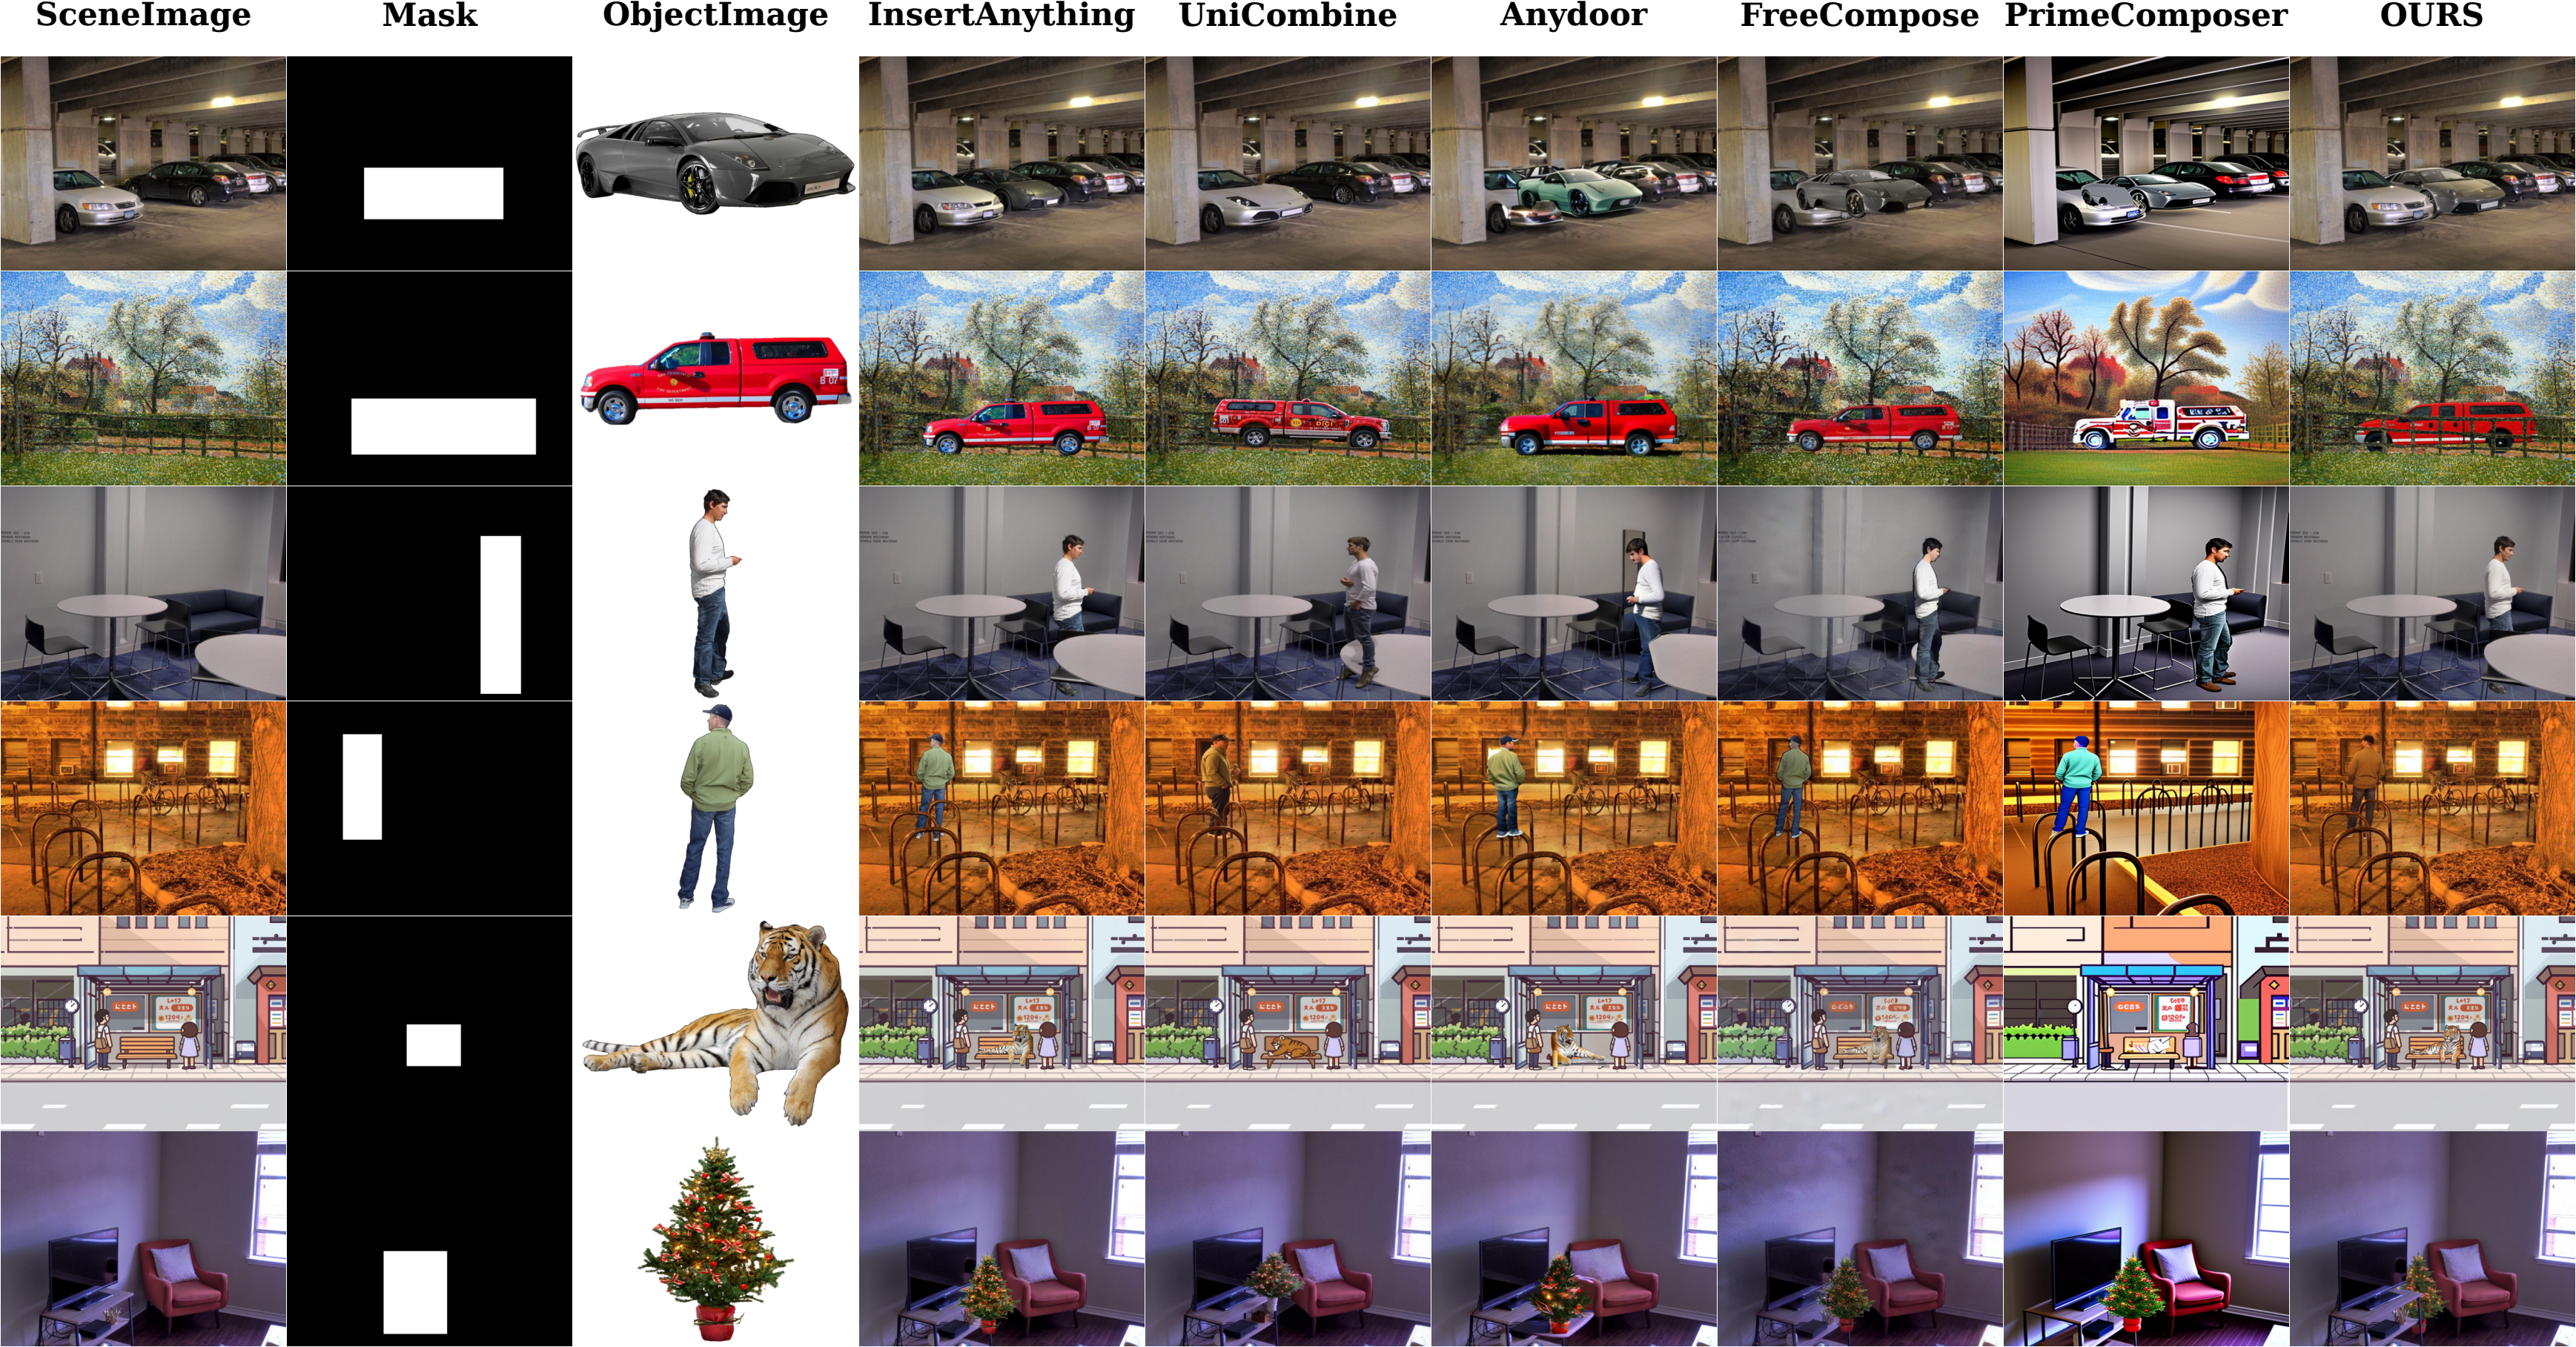



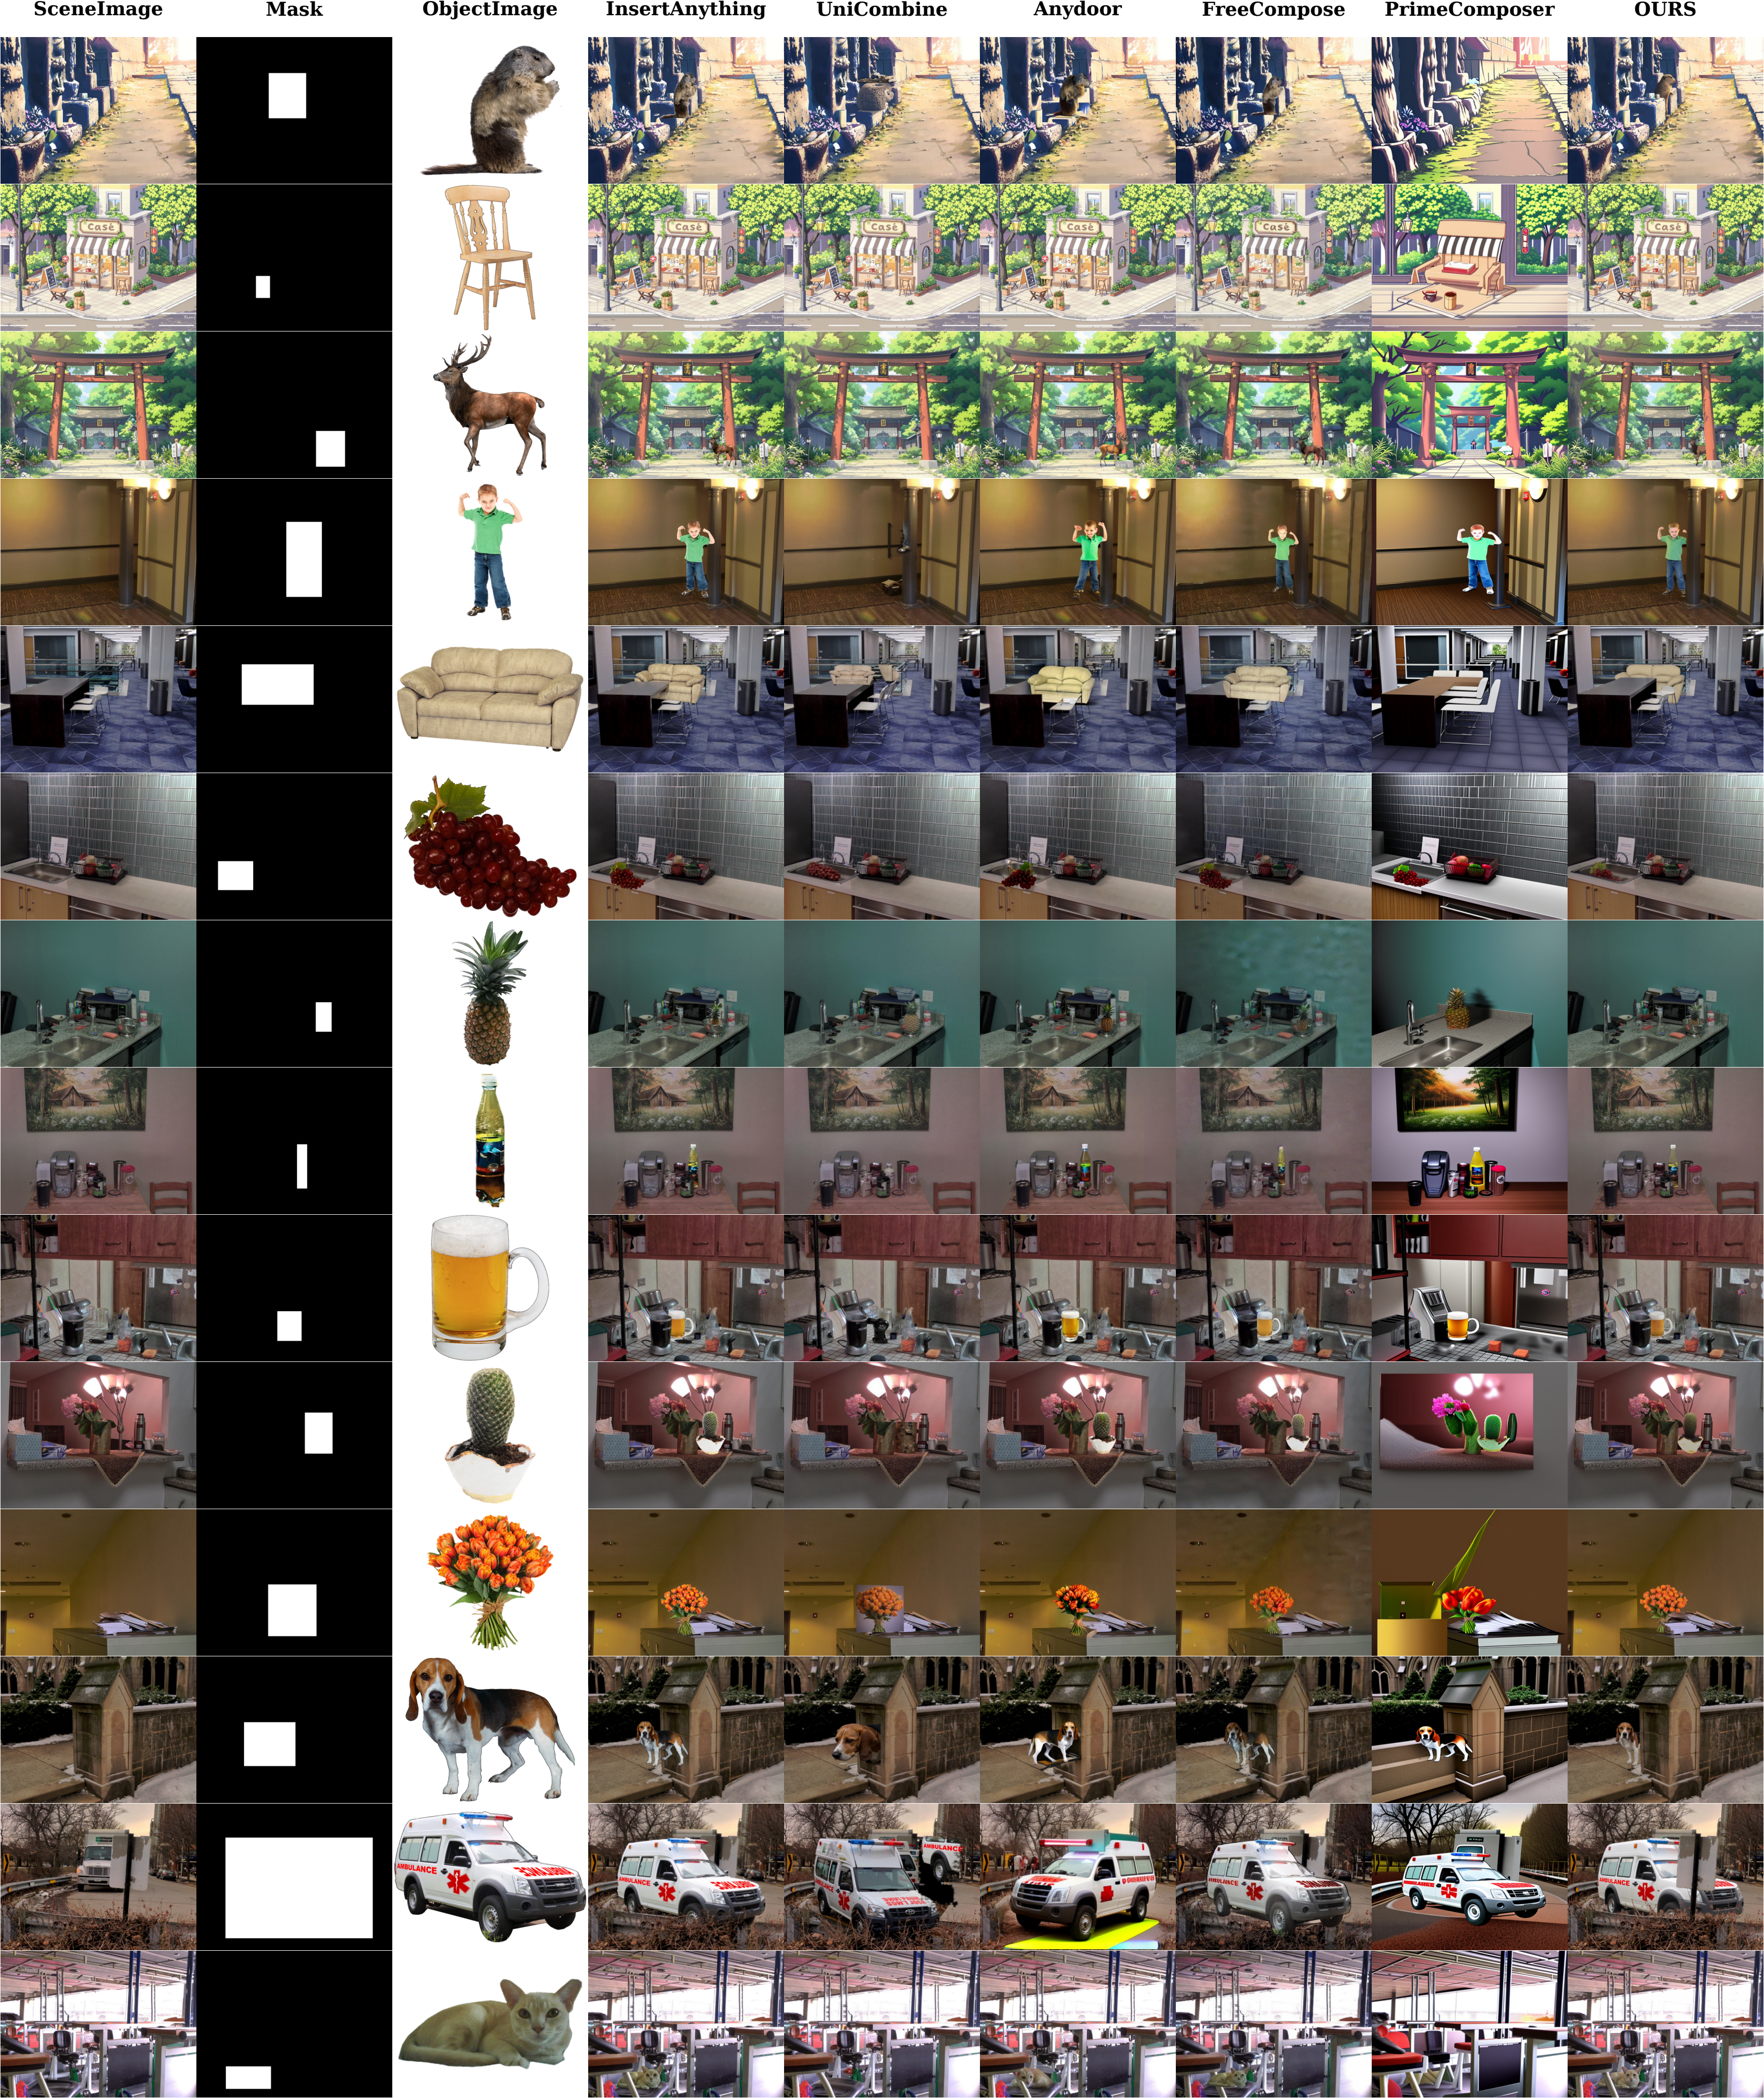



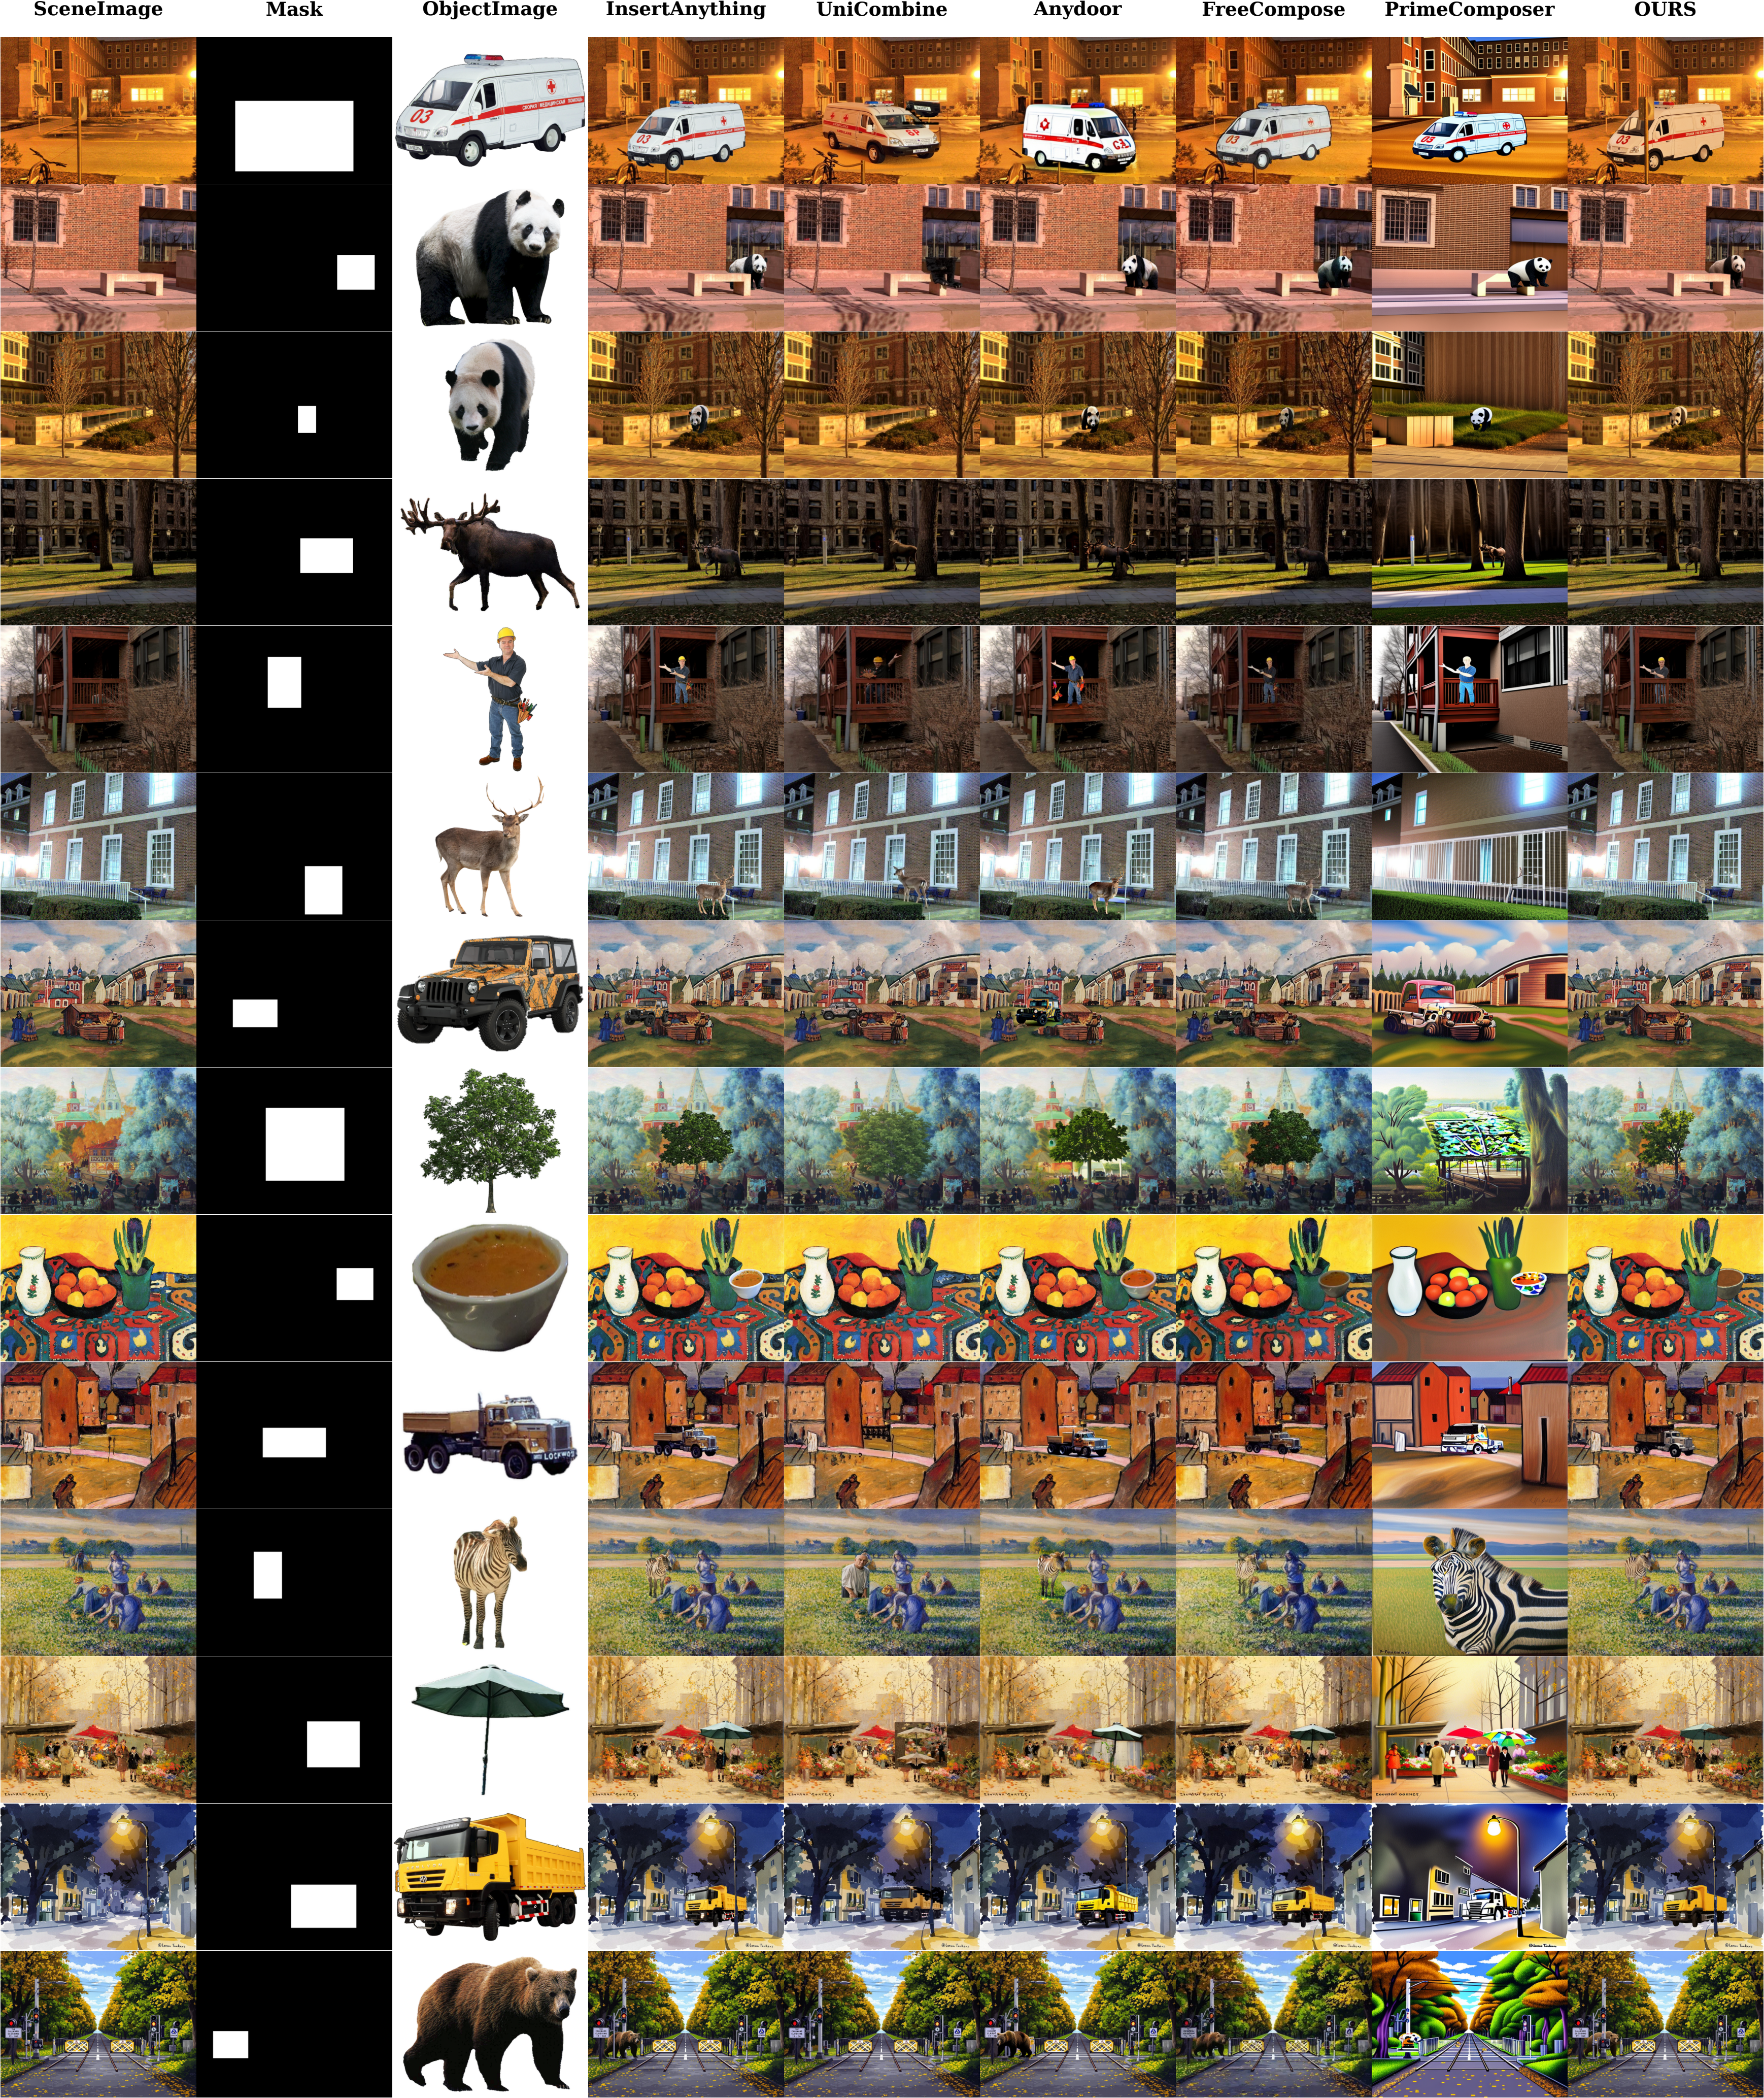

Supplement: supplementary_material [file highres_results.pdf › highres_results.pdf]
